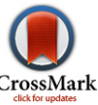

# Self-Medication Practices in Mekelle, Ethiopia

Tadele Eticha\*, Kalkidan Mesfin

Department of Pharmacy, College of Health Sciences, Mekelle University, Mekelle, Ethiopia

## Abstract

**Background:** Self-medication makes consumers more health conscious, reduces treatment burden on healthcare facilities and curtails the cost and time of obtaining access to treatment. However, it increases risks such as drug resistance, adverse drug reactions, incorrect diagnosis, drug interactions and polypharmacy. The purpose of this study was to assess the practices and factors associated with self-medication in Mekelle, Tigray region, Ethiopia.

**Methods:** A cross-sectional study was undertaken in Mekelle from February to March 2013. A structured and pre-tested questionnaire was used for data collection to assess self-medication practices. Data were analyzed using of Statistical Package for Social Sciences (SPSS) version 20.0.

**Results:** Among self-medicated study participants, 199(73.7%) were males and 71(26.3%) were females with mean age of 28.65 years. The most frequently reported illnesses or symptoms of illnesses that prompted self-medication of study participants were headache/fever (20.7%), gastrointestinal diseases (17.3%) and respiratory tract infections (15.9%) with the main reasons being mildness of the disease, prior experience and less expensive. The majority of drug consumers made their requests by telling their symptoms, by mentioning specific names of the drugs and by showing old samples. Analgesics/antipyretics, gastrointestinal drugs, respiratory drugs and oral rehydration salt were the most frequently requested categories of drugs. Pharmacists followed by other healthcare providers were the most frequently reported source of drug information for self-medication.

**Conclusions:** The results of this study demonstrated that self-medication practices were common for a wide range of illnesses. Health professionals, especially community pharmacists need to educate people on the benefits and risks of self-medication to encourage responsible self-medication.

**Citation:** Eticha T, Mesfin K (2014) Self-Medication Practices in Mekelle, Ethiopia. PLoS ONE 9(5): e97464. doi:10.1371/journal.pone.0097464

**Editor:** Alfonso Carvajal, Universidad de Valladolid, Spain

**Received:** November 21, 2013; **Accepted:** April 20, 2014; **Published:** May 12, 2014

**Copyright:** © 2014 Eticha, Mesfin. This is an open-access article distributed under the terms of the Creative Commons Attribution License, which permits unrestricted use, distribution, and reproduction in any medium, provided the original author and source are credited.

**Funding:** The research article was presented by Kalkidan Mesfin as a direct study in the partial fulfillment for the requirement of Bachelor of Degree in Pharmacy at Department of Pharmacy, College of Health Sciences, Mekelle University under supervision of Tadele Eticha. The Department of Pharmacy supported the study by providing stationery materials and services such as printing and copying services. The funders had no role in study design, data collection and analysis, decision to publish, or preparation of the manuscript.

**Competing Interests:** The authors have declared that no competing interests exist.

\* E-mail: td.eticha@gmail.com

## Introduction

Self-medication is an important part of daily self-care behavior and one of the vital issues under debate in healthcare systems [1]. According to World Health Organization, self-medication is the selection and use of medicines by individuals to treat self-recognized illnesses or symptoms [2]. The International Pharmaceutical Federation defines self-medication as the use of non-prescription medicines by people on their own initiative. Self-care, including self-medication, has been a feature of healthcare for many years and people have always been keen to accept more personal responsibility for their health status [3].

Self-medication is a fairly widespread practice in the world, particularly in economically deprived communities. When practiced correctly, self-medication has a positive impact on individual and healthcare system. It allows patients to take responsibility and build confidence to manage their own health, thereby, promoting self-empowerment. Furthermore, it can save the time spent in waiting for a doctor, and even save life in acute condition and may contribute to decrease healthcare cost [1].

The World Health Organization has also pointed out that responsible self-medication can help to prevent and treat ailments that do not require medical consultation and provides a cheaper alternative for treating common illnesses. Nevertheless, the individual bears primary responsibility for the use of self-medication products. All parties involved in self-medication should be aware of the benefits and risks of any self-medication product. Self-medication may be associated with certain risks such as drug resistance, drug interactions, adverse drug reactions, increased polypharmacy, incorrect diagnosis and drug dependence [1,2,4–8]. The present study was thus conducted to evaluate the practices of self-medication and to identify factors associated with it in Mekelle, Tigray region, Ethiopia.

## Materials and Methods

### Study Setting

The study site was Mekelle town, Ethiopia. Mekelle is the capital city of the Tigray Regional State, northern Ethiopia, situated at 783 km to the North of Addis Ababa.

This study was undertaken in community pharmacies found in Mekelle. There was a total of 11 community pharmacies, 37 drug shops and nine drug vendors in Mekelle town. Community pharmacies were classified into private and public community pharmacies. Three community pharmacies were selected randomly from each, and therefore, six community pharmacies were included in this study.

### Study Design, Participants and Sampling

A cross-sectional study was performed in the selected community pharmacies from February to March 2013. Participants in the survey were all people who came to the community pharmacies for self-medication. The sample size was calculated by considering 95% confidence interval, 5% margin of error and 10% contingency for loss. The calculated sample size depending on the previous study, which recorded 27.6% of the prevalence rate of self-medication in Jimma town, southwest Ethiopia [9] was 307. A convenient sampling technique was applied to distinguish the study participants from among those who came to the community pharmacies to buy drugs for self-medication. Study participants were interviewed after they made their requests, but before they were provided with information on the drugs they requested.

### Ethical Consideration

The study was approved for ethical issues by the Health Research Ethics Review Committee of College of Health Sciences, Mekelle University. Further approval was obtained from the community pharmacies before conducting the survey. Written informed consent was obtained from each respondent prior to the interview.

### Data Collection and Analysis

A structured questionnaire to rate self-medication practices and its determining factors was developed in English; then translated into the local language (Tigrigna) and back into English to check the accuracy by an independent translator. The standardized questionnaire had been pre-tested before the actual data collection. The questionnaire consisted of socio-demographic characteristics of study participants, types of illnesses or symptoms of illnesses for which self-medication was sought, reasons and type of requests for self-medication, sources of advice and category of drug products demanded for self-medication.

Data were introduced in the Statistical Package for Social Sciences (SPSS) version 20.0 to generate descriptive statistics. The results were shown in absolute figures and percentages as depicted in Tables and Figures.

### Results

Of the total of 307 questionnaires distributed to be filled during the survey period, among them 270 (87.9%) were filled completely and collected, which renders the response rate of 87.9% while questionnaires with incomplete information were rejected.

### Socio-demographic Characteristics

The mean age of the study participants was 28.65 years and most (42.6%) of them were in the age group of 25–35. The majority (73.7%) of the study participants were male. More than half (53.0%) of the respondents graduated from college or university while 85 (31.4%) had secondary school education. The majority (44.8%) of the respondents were students and 101 (37.4%) earned monthly household income of 500–1000 Ethiopian Birr (ETB, exchange rate 1 USD = 18.8273 ETB). Of the total

**Table 1.** Socio-demographic characteristics of study participants (n = 270).

| Characteristics        | Frequency              | Percentage |      |
|------------------------|------------------------|------------|------|
| Gender                 | Female                 | 71         | 26.3 |
|                        | Male                   | 199        | 73.7 |
| Age                    | <25                    | 105        | 38.9 |
|                        | 25–35                  | 115        | 42.6 |
|                        | >35                    | 50         | 18.5 |
|                        | Mean age               | 28.65      |      |
| Education status       | Illiterate             | 21         | 7.8  |
|                        | Primary school         | 21         | 7.8  |
|                        | Secondary school       | 85         | 31.4 |
|                        | Collage/university     | 143        | 53.0 |
| Employment status      | Employed               | 75         | 27.8 |
|                        | Unemployed             | 49         | 18.1 |
|                        | Student                | 121        | 44.8 |
|                        | Merchant               | 25         | 9.3  |
| Monthly income in ETB  | <500                   | 72         | 26.7 |
|                        | 500–1000               | 101        | 37.4 |
|                        | >1000                  | 97         | 35.9 |
| Special drug consumers | Pregnant               | 21         | 7.8  |
|                        | Breast-feeding         | 14         | 5.2  |
|                        | Has chronic disease(s) | 61         | 22.6 |

Exchange rate: 1 USD = 18.8 Ethiopian Birr (ETB).

doi:10.1371/journal.pone.0097464.t001

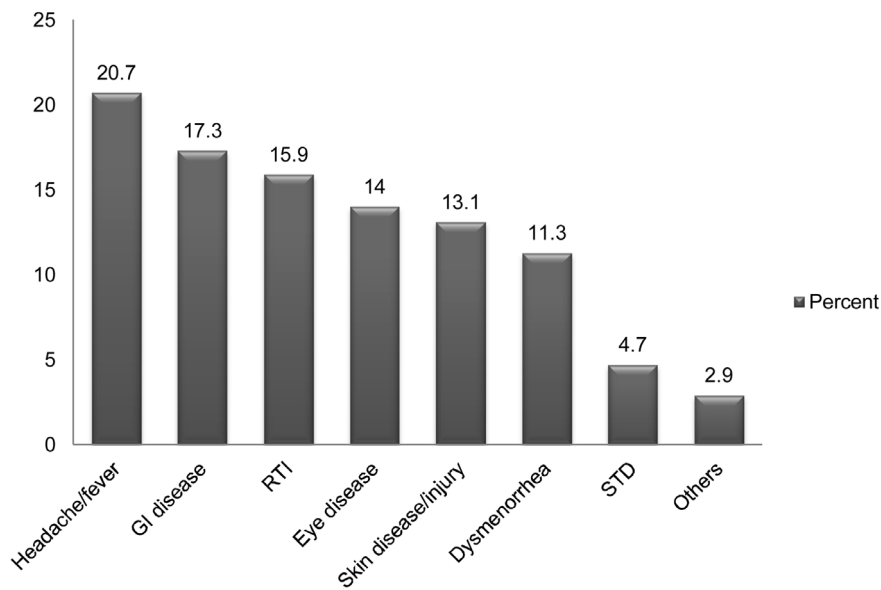

**Figure 1. Type of illnesses reported by the study participants (n = 270).** Figure 1 shows the type of illnesses reported by the study participants that prompted them for self-medication. The major illnesses reported were headache or fever (20.7%), GI disease (17.3%), RTI (15.9%), eye disease (14.0%), skin disease/injury (13.1) and dysmenorrhea (11.3%).  
doi:10.1371/journal.pone.0097464.g001

self-medicated people, 22.6% had chronic disease(s), 7.8% and 5.2% were pregnant and breastfeeding mothers, respectively (Table 1).

### Self-medication Practice

Type of illnesses reported by the study participants that prompted them for self-medication is shown in Figure 1. The major illnesses reported were headache or fever (20.7%), gastrointestinal (GI) disease (17.3%), respiratory tract infection (RTI) (15.9%), eye disease (14.0%), skin disease/injury (13.1) and dysmenorrhea (11.3%).

The major reasons listed by the self-medicated study participants are shown in Table 2. Self-medicated respondents provided reasons that 21.7% of them believed the disease was not serious; 20.7% of them have had prior experience to the illness and/or the drug; 20.2% of them were of the opinion that it was less expensive in terms of time and money; 17.0% of them believed that it was an emergency care; and 16.9% of them requested medications for prevention of known or unknown illness or symptoms of illnesses.

Following the reasons for self-medication, drug consumers were asked or observed on the types of drugs they requested. The majority (31.9%) of the drug consumers made their requests by telling their symptoms to a pharmacy professional. One hundred

and twenty (20.1%) of the respondents requested drugs by mentioning specific names of the drugs or drug products, generic or brand while 5.0% of them by mentioning the category of the drug to which it belonged. However, 18.8% of the drug consumers were requesting drugs by showing old samples or packages of drug products, 12.6% by presenting pieces of paper and 7.7% by describing the physical characteristics such as the color and/or shape of drug products (Table 3).

The most often requested category of drugs by self-medicated respondents were analgesics/antipyretics (20.8%), GI drugs (17.5%), respiratory drugs (14.9%), oral rehydration salt (ORS) (14.2%), vitamins (11.1%) and antimicrobials (8.4%) (Figure 2).

The three most usual sources of advice/information for self-medication were pharmacists (22.9%), healthcare providers such as doctors, nurses and health assistants, but without formal prescriptions (20.6%), and friends, neighbors or relatives (18.5%). Nevertheless, 12.8% of the respondents obtained information by reading drug related materials such as labels, leaflets or promotional materials while 12.5% of them were suggested by traditional healers (Table 4).

**Table 2. Reasons for self-medication (n = 270).**

| Reason for self-medication                 | Frequency | Percentage |
|--------------------------------------------|-----------|------------|
| Emergency use                              | 123       | 17.0       |
| Disease not serious                        | 157       | 21.7       |
| For prevention of known or unknown disease | 122       | 16.9       |
| Prior experience of the drug               | 150       | 20.7       |
| Less expensive in terms of time and money  | 146       | 20.2       |
| Others                                     | 26        | 3.6        |

doi:10.1371/journal.pone.0097464.t002

**Table 3.** Type of requests for self-medication (n = 270).

| Type of requests for the drug                      | Frequency | Percentage |
|----------------------------------------------------|-----------|------------|
| Mentioning the name of the drug                    | 120       | 20.1       |
| Mentioning the category of the drug                | 30        | 5.0        |
| Telling the symptoms of illness                    | 190       | 31.9       |
| Showing an old sample/package of the drug          | 112       | 18.8       |
| Presenting piece of paper (not a prescription)     | 75        | 12.6       |
| By describing physical characteristics of the drug | 46        | 7.7        |
| Others                                             | 23        | 3.9        |

doi:10.1371/journal.pone.0097464.t003

## Discussion

Self-medication gives more freedom to patients in taking care of minor ailments. It makes consumer more health conscious, reduces treatment burden on healthcare facilities and curtails the cost and time of gaining access to treatment. On the other hand, self-medication increases risks such as excessive use of medication, extended duration of consumption, incorrect diagnosis, drug interactions and polypharmacy [10].

In this study, analgesics/antipyretics were the most commonly used class of drugs as reported in other studies [11–15]. This is because such drugs are applied to treat uncomplicated common illness such as headache, fever and pain. This confirms that analgesics/antipyretics are the commonly used over-the-counter medications for self-medication [16]. Over-the-counter drugs, selected and utilized properly, can be highly effective in ameliorating symptoms while avoiding trivial or unnecessary physician office visits and more expensive, but not always more effective, prescription drug use [7]. Similarly GI and respiratory drugs were usually utilized for the treatment of GI diseases and

respiratory infections in the present work as indicated in other studies [12,13]. Requests for ORS, a lifesaving OTC drug, were eminent for all reported illnesses. This contradicts with the results of other studies where requests for ORS were very low for ORS [12,13]. Th may have resulted from high public awareness on the usefulness of ORS in the management of diarrheal diseases.

On the other hand, antibiotic self-medication needs a special attention. Self-medication with other drugs can cause harm only to the person who consumes it; however, antibiotic self-medication have a global risk of spread of antibiotic resistance [5]. High prevalence of self-medication with antibiotics was widely reported in many studies [12,13,17–19]. Nevertheless, requests for antimicrobial drugs were very low for all reported illnesses in this study. The possible explanations for the lower in our work might be that there is a public awareness of the problems associated with antibiotic self-medication.

Non-seriousness of the illness, prior experience and less expensive in terms of time and money were the major reasons for self-medication in this survey. These reasons for self-medication were frequently reported in other studies

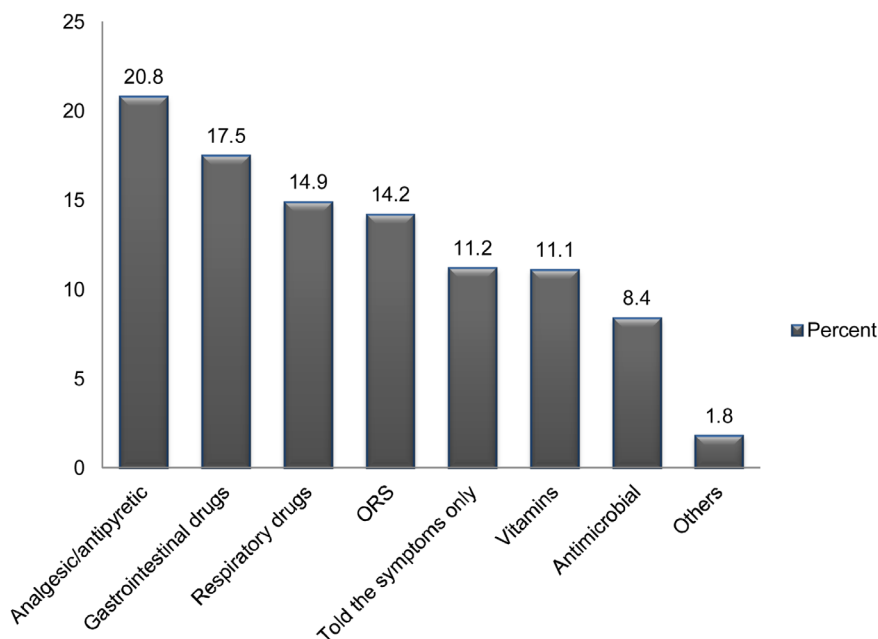

**Figure 2. Category of drugs requested for self-medication (n = 270).** Figure 2 demonstrates the most frequently requested category of drugs by self-medicated respondents. The most commonly requested category of drugs were analgesics/antipyretics (20.8%), GI drugs (17.5%), respiratory drugs (14.9%), ORS (14.2%), vitamins (11.1%) and antimicrobials (8.4%).  
doi:10.1371/journal.pone.0097464.g002

**Table 4.** Sources of advice for self-medication (n = 270).

| Sources of advice for self-medication                                        | Frequency | Percentage |
|------------------------------------------------------------------------------|-----------|------------|
| Received no information                                                      | 69        | 9.9        |
| Read information material of the drug                                        | 89        | 12.8       |
| Advised by neighbors, friends or relatives                                   | 129       | 18.5       |
| Suggested by traditional healers                                             | 88        | 12.6       |
| Advised by physicians, nurses and health assistants but without prescription | 144       | 20.6       |
| Recommended by pharmacists or those working in the pharmacy                  | 160       | 22.9       |
| Others                                                                       | 19        | 2.7        |

doi:10.1371/journal.pone.0097464.t004

[9,11,16,18]. Most of the drug consumers made their requests by telling their symptoms, by mentioning specific names of the drugs and by showing old samples or packages of drug products as reported in other studies [12,13]. Major information sources for self-medication were pharmacists followed by other healthcare providers such as physicians, nurses and health assistants in this study. Pharmacists can play a critical role in assisting people to make informed self-care choices. According to the charter of collaboration between the Pharmaceutical Group of the European Community and the European Proprietary Medicines Manufacturers' Association: "The pharmacist is an adviser to the public on everyday healthcare and is a key figure in the supply and delivery of medicines to the consumer. He is a partner of the manufacturer of non-prescription medicines. Both share the common goals of service of high quality for the patient and encouragement of the rational use of medicines. The pharmacist in his professional capacity and in direct contact with patients is competent to provide sound advice on the medicines he supplies" [2]. Hence the role of community pharmacists in self-medication needs to be encouraged to promote responsible self-medication.

## Conclusions

People of all socio-demographic categories practice self-medication. The most frequent illnesses or symptoms of illnesses were

## References

- Almasdy D, Sherrif A (2011) Self-Medication Practice with Nonprescription Medication among University Students: a review of the literature. *Arch Pharma Pract* 2(3): 95–100.
- World Health Organization: Role of pharmacists in self-care and self-medication. Available: <http://apps.who.int/medicinedocs/pdf/whozip32e/whozip32e.pdf>. Accessed 26 January 2013.
- Joint Statement by the International Pharmaceutical Federation and The World Self-Medication Industry. Responsible Self-Medication. Available: [www.fip.org/uploads/database\\_file.php?id=241&table\\_id=.](http://www.fip.org/uploads/database_file.php?id=241&table_id=.) Accessed 19 January 2013.
- Hughes CM, McElnay JC, Fleming GF (2001) Benefits and risks of self medication. *Drug Safety* 24(14): 1027–1037.
- Patil AD (2013) Self medication: a potentially avoidable cause of antibiotic misuse and resistance. *Int J Basic Clin Pharmacol* 2: 498–499.
- Sweilch W (2004) Self-Medication and Over-the-Counter Practices: A Study in Palestine. *J sAl-Aqsa Univ* 8: 1–9.
- Covington TR (2006) Nonprescription Medications and Self-Care, Nonprescription Drug Therapy: Issues and Opportunities. *Am J Pharm Educ* 70(6): 137.
- Sapkota AR, Coker ME, Goldstein ER, Atkinson NL, Sweet SJ, et al. (2010) Self-medication with antibiotics for the treatment of menstrual symptoms in southwest Nigeria: a cross-sectional study. *BMC Public Health* 10: 610.
- Worku S, Mariam A (2003) Practice of Self-medication in Jimma Town. *Ethiop J Health Dev* 17(2): 111–116.
- Hussain A, Khanum A (2008) Self medication among university students of Islamabad, Pakistan- a preliminary study. *Southern Med Review* 1(1): 14–16.
- Gutema GB, Gadisa DA, Kidanemariam ZA, Berhe DF, Berhe AH, et al. (2011) Self-Medication Practices among Health Sciences Students: The Case of Mekelle University. *J App Pharm Sci* 01(10): 183–189.
- Andualem T, Gebre-Mariam T (2004) Self-Medication Practices in Addis Ababa: A Prospective Study. *Ethiop J Health Sci* 14(1): 1–11.
- Jain P, Sachan A, Singla RK, Agrawal P (2012) Statistical Study on Self Medication Pattern in Haryana, India. *Indo Global J Pharm Sci* 2(1): 21–35.
- Khade AM, Bashir MSM, Ravi S, Vadala KK (2012) Evaluation of Self-Medication Practice among Medical Students in AP. *Int J Basic App Med Sci* 2(2): 254–259.
- Silva MGC, Soares MCF, Muccillo-Baisch AL (2012) Self-medication in university students from the city of Rio Grande, Brazil. *BMC Public Health* 12: 339.
- Autá A, Omale S, Folorunsho TJ, David S, Banwat SB (2012) Medicine Vendors: Self-medication practices and medicine knowledge. *North J Med Sci* 4: 24–28.
- Tamuno I, Mohammed IS (2011) Self Medication with Antibiotics amongst Students of a Nigerian Tertiary Institution. *J Basic Appl Sci Res* 1(10): 1319–1326.
- Damodar G (2012) Assessment of Self-medication Practices among Medical, Pharmacy and Nursing Students at a Tertiary Care Teaching Hospital. *IJHP* 49: 79–83.
- Kumar N, Kanchan T, Unnikrishnan B, Rekha T, Mithra P, et al. (2013) Perceptions and Practices of Self-Medication among Medical Students in Coastal South India. *PLOS ONE* 8(8): e72247.

## Acknowledgments

We would like to acknowledge the staffs of the selected community pharmacies for their invaluable assistance during data collection. We are also grateful to the study participants who contributed their precious time.

## Author Contributions

Conceived and designed the experiments: TE KM. Performed the experiments: KM. Analyzed the data: TE. Contributed reagents/materials/analysis tools: TE KM. Wrote the paper: TE KM.
